# Biological roles and mechanistic actions of co-repressor complexes

Kristen Jepsen<sup>1</sup> and Michael G. Rosenfeld<sup>1,\*</sup>

<sup>1</sup>Howard Hughes Medical Institute, Department and School of Medicine, University of California, San Diego, 9500 Gilman Drive, La Jolla, CA 920393-0648, USA

\*Author for correspondence (e-mail: mrosenfeld@ucsd.edu)

*Journal of Cell Science* 115, 689-698 (2002) © The Company of Biologists Ltd

## Summary

Transcriptional repression, which plays a crucial role in diverse biological processes, is mediated in part by non-DNA-binding co-repressors. The closely related co-repressor proteins N-CoR and SMRT, although originally identified on the basis of their ability to associate with and confer transcriptional repression through nuclear receptors, have been shown to be recruited to many classes of transcription factor and are in fact components of multiple protein complexes containing histone deacetylase proteins. This association with histone deacetylase activity provides an important component of the mechanism that

allows DNA-binding proteins interacting with N-CoR or SMRT to repress transcription of specific target genes. Both N-CoR and SMRT are important targets for cell signaling pathways, which influence their expression levels, subcellular localization and association with other proteins. Recently, the biological importance of these proteins has been revealed by studies of genetically engineered mice and human diseases such as acute promyelocytic leukemia (APL) and resistance to thyroid hormone (RTH).

Key words: N-CoR, SMRT, Co-repressor, HDAC

## Introduction

The regulation of gene expression by transcriptional control is required for many cellular events and for the proper development of an organism. The essential nature of such control is highlighted by the large number of proteins devoted to regulation of transcription by RNA polymerase II. In eukaryotes, these proteins number in the thousands and include sequence-specific DNA-binding factors, the basal transcriptional machinery, chromatin-remodeling factors, enzymes responsible for covalent modifications of histones and other proteins and cofactors that bridge DNA-binding factors and enzymes. Although activation of transcription has long been recognized as an essential component of gene regulation, the realization that repression of transcription also plays a fundamental role has been appreciated only recently. Repressive factors use several distinct mechanisms, including competition with activator proteins for DNA binding, sequestration of such activators, interaction with the core transcriptional machinery, DNA methylation and recruitment of complexes that have histone deacetylase activity. Here we focus on components of the co-repressor machinery that depend, at least in part, on the actions of histone deacetylases, discussing primarily the nuclear receptor co-repressor (N-CoR) and silencing mediator of retinoic and thyroid hormone receptors (SMRT) (Fig. 1a) (Chen and Evans, 1995; Horlein et al., 1995; Ordentlich et al., 1999; Park et al., 1999).

## Identification of nuclear receptor co-repressors

The knowledge that the thyroid hormone and retinoic acid receptors (T<sub>3</sub>R and RAR) actively repress transcription in the absence of their cognate ligands through transferable repression domains (Baniahmad et al., 1992) led to the search for factors that might be required for effective gene repression

by unliganded nuclear receptors. The identification of a 270 kDa protein associated with unliganded T<sub>3</sub>R-RXR heterodimers led to the cloning of N-CoR (Horlein et al., 1995), and a similar approach identified a second, homologous protein SMRT (Chen and Evans, 1995; Ordentlich et al., 1999; Park et al., 1999).

N-CoR and SMRT both contain a conserved bipartite nuclear-receptor-interaction domain (NRID) (Li et al., 1997a; Seol et al., 1996; Zamir et al., 1996) and three independent repressor domains that can actively repress a heterologous DNA-binding domain (Chen and Evans, 1995; Horlein et al., 1995; Ordentlich et al., 1999; Park et al., 1999) (Fig. 1b). Further analysis of the NRIDs revealed that each contains a critical L-X-X-X-I-X-X-X-I/L motif, which includes the L/I-X-X-I/V-I motif termed the CoRNR box (Hu and Lazar, 1999; Nagy et al., 1999; Perissi et al., 1999). This L-X-X-X-I-X-X-X-I/L motif is similar to the L-X-X-L-L recognition motif present in nuclear receptor coactivators (Heery et al., 1997; McInerney et al., 1998) but is predicted to form an extended  $\alpha$ -helix one helical turn longer than the coactivator motif. A preference of RAR for SMRT and T<sub>3</sub>R for N-CoR (Cohen et al., 2000) is due to specific sequences in the L-X-X-X-I-X-X-X-I/L motif (Hu et al., 2001) as well as to a T<sub>3</sub>R-specific interaction domain present in N-CoR but not SMRT (Cohen et al., 2001).

## Identification of histone deacetylase proteins

Although co-repressor molecules contributing to the repression of T<sub>3</sub>R and RAR had been identified, the mechanism by which N-CoR and SMRT function remained elusive until several groups reported their association with mRpd3 and mSin3A and B, mammalian homologues of the yeast proteins Rpd3p/Histone Deacetylase 1 (msx mit1) and Sin3p (Heinzel

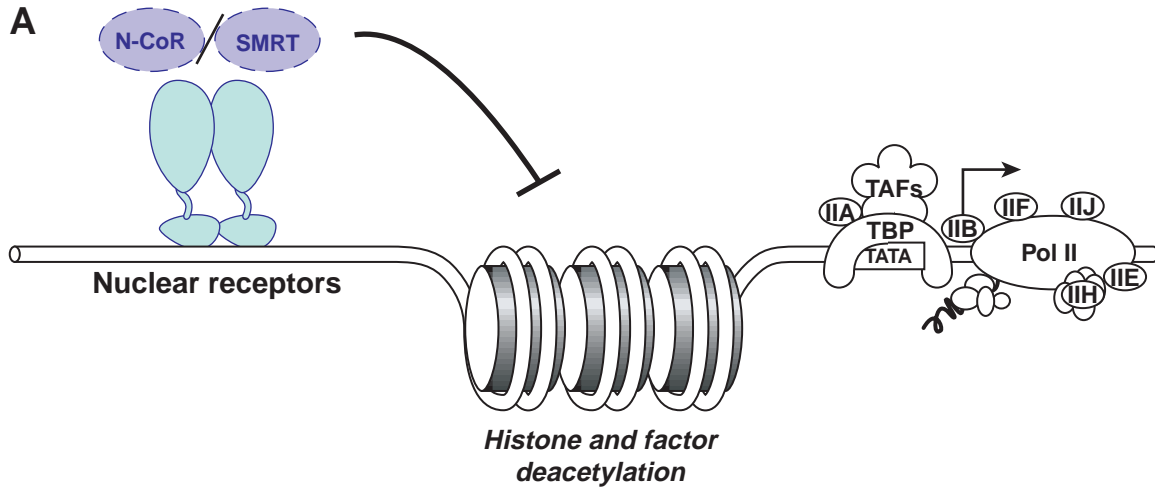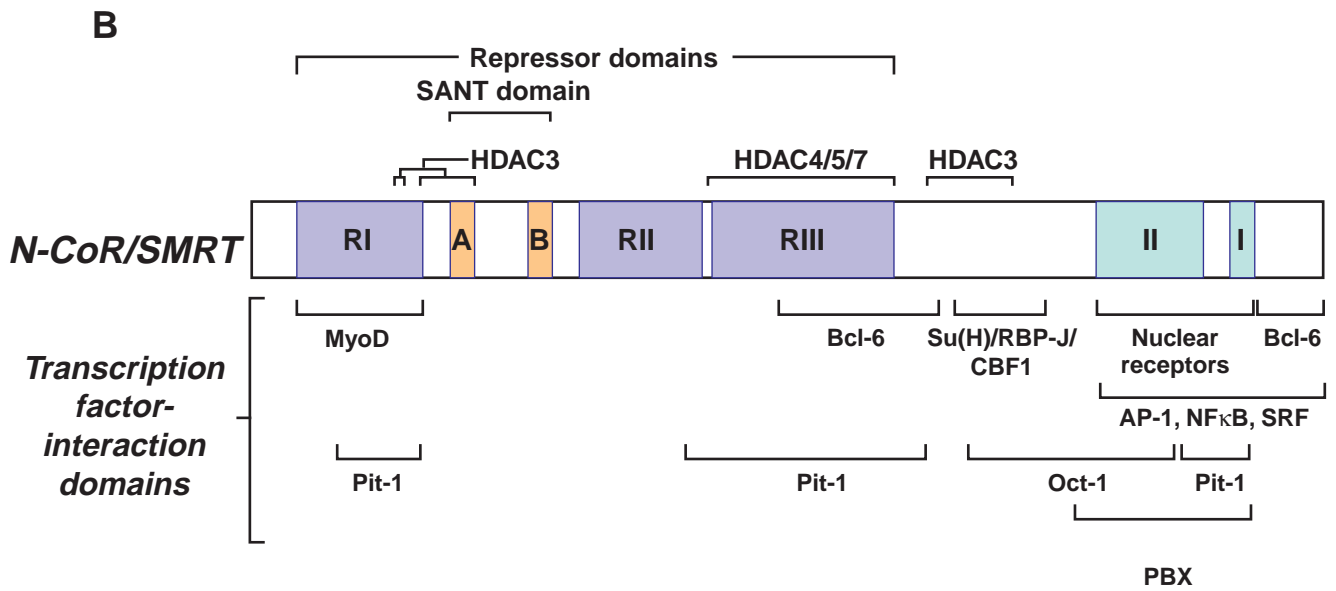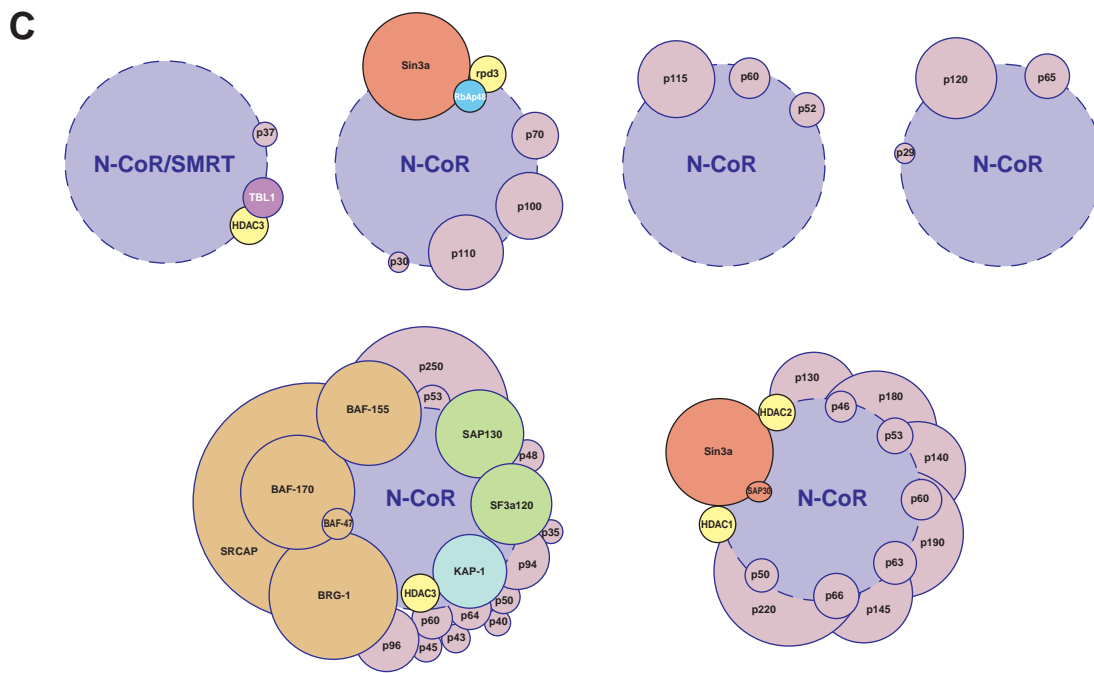

**Fig. 1.** (A) Transcriptional repression by nuclear receptors is regulated by recruitment of the co-repressors N-CoR and/or SMRT. (B) The domains of N-CoR/SMRT. Repression domains (RI, RII, RIII) and SANT domains (A and B) are indicated, as are interaction domains for HDACs, nuclear receptors (I and II) and other transcription factors. (C) N-CoR–SMRT complexes. Biochemical purification techniques have revealed several different complexes recruited by N-CoR and/or SMRT (Jones et al., 2001; Li et al., 2000; Underhill et al., 2000; Wen et al., 2000; Guenther et al., 2000).

et al., 1997; Nagy et al., 1997). Several years previously, the observations that acetylation of specific lysine residues in the N-termini of histones correlates with increased transcription and that heterochromatic regions are generally hypoacetylated (Grunstein, 1990; Turner, 1993) had led to studies of the role of histone deacetylase complex HDAC proteins in transcriptional repression. Experiments in yeast identified two HDAC complexes, HDA and HDB (Rundlett et al., 1996). Further characterization of these complexes identified two closely related proteins, Hda1p and the previously cloned transcriptional regulator, Rpd3p, (Vidal and Gaber, 1991), respectively, as the proteins essential for histone deacetylase activity (Rundlett et al., 1996). These proteins were the first members of what are now known to be large families of histone deacetylases, which are classified on the basis of their homology to Rpd3p or Hda1p as class I or class II HDACs, respectively (Gray and Ekstrom, 2001).

Rpd3p is linked by epistasis to Sin3p (Rpd1) (Bowdish and Mitchell, 1993; McKenzie et al., 1993; Vidal and Gaber, 1991), which was initially identified in genetic screens for mutations allowing expression of *HO* (*homothallic* gene) in the absence of its activating protein, Swi5 (Nasmyth et al., 1987). Although an enzymatic function of Sin3p has not been demonstrated, the protein can be linked through the SWI proteins to chromatin-remodeling events (Winston and Carlson, 1992). Sin3p and Rpd3p are both required for full repression and full activation of transcription of several target genes in yeast (Vannier et al., 1996; Vidal and Gaber, 1991; Vidal et al., 1991), which suggests that, in common with histone acetylation, histone deacetylation is a major player in the regulation of transcription.

To address the relationship between histone deacetylation and transcription at the most basic level, Kadonaga and colleagues used purified recombinant *Drosophila* HDAC1 in *in vitro* transcription assays on chromatinized templates (Huang and Kadonaga, 2001). Their experiments demonstrate that HDAC1 alone can mediate histone deacetylation and that a Gal4-dHDAC1 fusion protein can repress transcription by ~60% on chromatinized templates but not on naked DNA templates. Their data also suggest that HDAC activity blocks the initiation step of transcription. In some systems, N-CoR and SMRT can function as activating cofactors of HDAC3 (Guenther et al., 2001; Wen et al., 2000). This activation of HDAC3 is mediated by a domain of N-CoR and SMRT that overlaps with the SANT domain (named for its presence in Swi3, Ada2, N-CoR, and TFIIB) (Aasland et al., 1996; Wen et al., 2000; Guenther et al., 2001).

In addition to the class I and class II HDAC families, which are themselves related, a distinct class of HDAC proteins (class III HDACs) exists: silent information regulator 2 (SIR2)-like proteins (Gottschling, 2000). The *SIR2* genes were initially

identified by analysis of mutations that result in expression of regions of the yeast genome that are normally transcriptionally silenced (Nasmyth, 1982; Rine et al., 1979). Indeed, Braunstein et al., prior to the identification of the class I and class II HDAC proteins, noted that overexpression of Sir2p in yeast cells produces histones that are under acetylated (Braunstein et al., 1993). This suggested, although in the absence of any biochemical evidence, that Sir2p has a role in histone deacetylation. Later studies identified nicotinamide adenine dinucleotide (NAD)-dependent ADP-ribosyltransferase activity associated with the human Sir2p homologue (Tsang and Escalante-Semerena, 1998), and extension of these studies revealed the surprising fact that Sir2p is in fact an NAD-dependent histone deacetylase (Imai et al., 2000; Landry et al., 2000; Smith et al., 2000). Interestingly, mammalian Sir2 can interact with and deacetylate the p53 protein, reducing the transcriptional activity of p53 (Luo et al., 2001; Vaziri et al., 2001). The potential ability of this and other classes of HDACs to deacetylate proteins other than histones raises interesting possibilities for their ability to regulate gene expression.

The precise roles of histone deacetylation in transcriptional repression are not fully understood. For instance, differential display analysis of cells treated with the histone deacetylase inhibitor trichostatin A (TSA) revealed that the expression of just 2% of cellular genes (8 of 340 genes examined) changed, despite an increase in core histone acetylation (Van Lint et al., 1996). Rpd3p-null strains in yeast have defects in both transcriptional repression and activation (Rundlett et al., 1996; Vidal et al., 1991) and in fact show increased repression at telomeric heterochromatin (Rundlett et al., 1996), revealing the complicated nature of the transcriptional alterations produced by promoter-specific usage of co-regulatory factors. Recent studies examining the acetylation state at various promoters revealed that different transcriptional activators confer distinct patterns of histone acetylation and that activation is not necessarily related to increased acetylation (Deckert and Struhl, 2001). Experiments with Sin3p and Rpd3 mutants, however, did reveal decreased acetylation of histones (Deckert and Struhl, 2001). Thus many questions relating to the complex nature of transcriptional repression versus activation with regards to the acetylation state of histones remain, although the finding that the class III HDAC Sir2 can deacetylate p53 (Luo et al., 2001; Vaziri et al., 2001) suggests that HDAC proteins have multiple roles in the cell.

### Purification of co-repressor complexes

Recent biochemical evidence demonstrates that HDACs are associated with known repression complexes, building a circumstantial case for the involvement of HDACs in transcriptional repression (Fig. 2). HDAC1 and HDAC2 have been found in several complexes, including the Sin-associated protein (SAP) complex (Zhang et al., 1997; Zhang et al., 1998c) and the nucleosome remodeling and histone deacetylation (NURD) complex (Tong et al., 1998; Xue et al., 1998; Zhang et al., 1998b; Zhang et al., 1999), which has ATP-dependent chromatin remodeling activity (Fig. 2) (Knoepfler and Eisenman, 1999). Both complexes also contain retinoblastoma protein (Rb)-associated proteins RbAp-46 and RbAp-48, along with several components specific for either

complex. This suggests that a core HDAC complex differentially recruits additional proteins that impart distinct functional roles to each complex. Complexes purified by use of anti-HDAC1 or anti-HDAC2 antibodies share common components with the NURD complex, including MTA 2, the ATPase Mi-2, RbAp-46 and RbAp-48 and methyl-CpG-binding domain proteins MBD 2 and/or MBD3 (Fig. 2) (Humphrey et al., 2001). The presence of proteins involved in binding to methylated CpG dinucleotides is particularly interesting given the association between DNA methylation and gene silencing and is consistent with studies that show that the closely related methyl-CpG-binding protein MeCP2 not only interacts with HDACs and mSin3A but has TSA-dependent repression abilities (Jones et al., 1998; Nan et al., 1998). Although MeCP2 has not been identified in complexes with N-CoR or SMRT, it has been shown to bind N-CoR (Kokura et al., 2001). Thus a picture begins to emerge in which previously distinct methods of transcriptional repression, including ATP-dependent chromatin remodeling, histone deacetylation and DNA methylation, have overlapping roles and influence one another's distinct enzymatic activities.

Depending on the purification strategy, different HDAC proteins, including HDAC1, HDAC2 and HDAC3, have also been identified in both N-CoR and SMRT complexes (Fig. 1b) (Guenther, 2000; Jones et al., 2001; Li et al., 2000; Underhill et al., 2000; Wen et al., 2000). A subset of N-CoR complexes share common components with the SAP complex and contain HDAC1, HDAC2 and mSin3 (Zhang et al., 1997; Zhang et al., 1998c). Biochemical purification of complexes using anti-N-CoR or anti-HDAC3 antibodies also revealed a distinct complex that contains HDAC3, N-CoR or SMRT, and transducin (beta)-like protein 1 (TBL1) (Fig. 1b) (Guenther et al., 2000; Li et al., 2000; Underhill et al., 2000; Wen et al., 2000). TBL-1 has six WD-40 repeats (Bassi et al., 1999), a motif also present in the Tup1 and Groucho co-repressors, and is homologous to the *Drosophila* protein ebi, which is involved in epidermal growth factor receptor signaling pathways (Dong et al., 1999). Under different conditions, an N-CoR-SMRT-HDAC3 complex can also contain Krab-associated protein 1 (KAP-1), a TSA-sensitive co-repressor that interacts with members of the heterochromatin protein 1 (HP1) family, and several members of the Swi/Snf ATP-dependent chromatin-remodeling complex family, which is reminiscent of the ATP-dependent chromatin-remodeling proteins found in the NURD complex (Fig. 1b; Fig. 2) (Underhill et al., 2000). Several groups have also shown that the third repressor domain of N-CoR and SMRT can directly interact in vitro with class II HDACs, including HDAC4, HDAC5 and HDAC7 (Huang et al., 2000; Kao et al., 2000), suggesting the full range of complexes has yet to be purified.

HDAC1 and HDAC2 have also been identified as part of a complex containing CoREST and a novel protein homologous to a diverse group of oxidases and dehydrogenases (Fig. 2) (Humphrey et al., 2001; You et al., 2001), which is also present in one version of the NURD complex (Tong et al., 1998). This latter protein is of particular interest because its potential enzymatic function is reminiscent not only of the NAD-

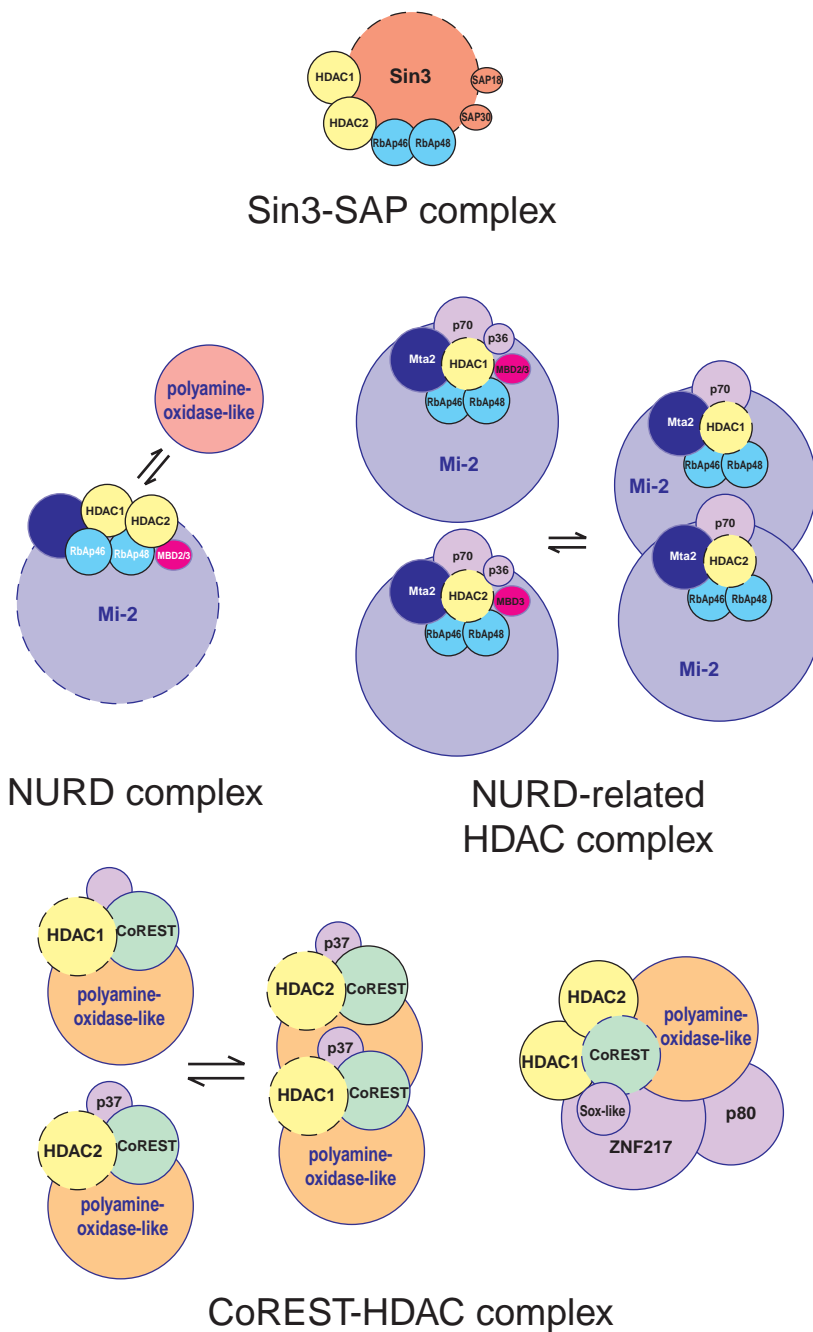

**Fig. 2.** Other HDAC-containing co-repressor complexes identified by biochemical purification, including the Sin3-SAP (Sin-associated proteins) complex (Zhang et al., 1997; Zhang et al., 1998c), the NURD (nucleosome remodeling and histone deacetylation) complex (Tong et al., 1998; Xue et al., 1998; Zhang et al., 1998b; Zhang et al., 1999), a NURD-related HDAC-complex (Humphrey et al., 2001) and a CoREST-HDAC complex (Humphrey et al., 2001; You et al., 2001). Dashed outlines indicate the molecule that was used to purify each complex.

dependent Sir proteins discussed earlier but of another family of co-repressor proteins, the C-terminal binding proteins (CtBP), which have homology to dehydrogenase enzymes (Nibu et al., 1998; Schaeper et al., 1998). This suggests yet another enzymatic activity may be involved in transcriptional repression. Note that CoREST, which was first identified as a co-repressor for the neural restrictive factor REST (Andres et al., 1999), MTA1, a component of the NURD complex, and N-CoR and SMRT each contains a SANT domain (Aasland et al., 1996). This suggests that this domain is important for some aspects of repression.

### Other transcription factor partners

Although cloned on the basis of their interactions with unliganded RAR and T<sub>3</sub>R, N-CoR and SMRT appear to confer transcriptional repression on many transcription factors. Indeed, they serve as co-repressors for several members of the nuclear receptor superfamily, including v-ErbA, (Busch et al., 2000; Chen and Evans, 1995), RevErb (Zamir et al., 1996), COUP-transcription factors (Shibata et al., 1997), PPAR $\alpha$  (Dowell et al., 1999) and DAX1 (Crawford et al., 1998). Although steroid hormone receptors do not appear to interact with N-CoR or SMRT in the absence of ligand (Chen and Evans, 1995; Horlein et al., 1995), both the estrogen receptor (ER) and the progesterone receptor (PR) can interact with these co-repressors in the presence of their respective antagonists to repress transcription (Jackson et al., 1997; Lavinsky et al., 1998; Smith et al., 1997; Xu et al., 1996). In chromatin immunoprecipitation assays (ChIP) performed in the breast-tumor-derived cell line MCF-7, N-CoR and SMRT were present on the estrogen-responsive cathepsin D and pS2 promoters in the presence of the antagonist tamoxifen but not estrogen (Shang et al., 2000). These data suggest a role for N-CoR and SMRT in mediating the antagonist-associated effects of steroid hormone receptors (Chen and Evans, 1995; Horlein et al., 1995) and provide a mechanism for the clinical application of antagonistic ligands.

N-CoR and SMRT have also been implicated as co-repressors for a variety of unrelated transcription factors, which regulate diverse cellular processes (Fig. 1b). SMRT interacts with and can repress transcription by serum response factor (SRF), activator protein-1 (AP-1) and nuclear factor- $\kappa$ B (NF $\kappa$ B), which are all transcription factors involved in stimulation of cell proliferation (Lee et al., 2000). N-CoR and SMRT have both been implicated in abrogation of transcription by the evolutionarily related POU homeodomain factors Pit-1 (Xu et al., 1998) and Oct-1 (Kakizawa et al., 2001), which have important developmental roles, and by the homeobox factor PBX (Asahara et al., 1999; Shanmugam et al., 1999), which is an important determiner of cell fate and segment identity. These co-repressors also interact with the Pox/zinc finger transcription factor BCL-6, which may influence apoptosis (Dhordain et al., 1998; Huynh and Bardwell, 1998; Wong and Privalsky, 1998), and with the bHLH proteins MAD (Heinzel et al., 1997), MyoD (Bailey et al., 1999) and HES-related repressor proteins (HERPs) (Iso et al., 2001), to suppress proliferation or induce terminal differentiation, as well as with the Notch-activated adapter protein Su(H)/RBP-J/CBF1 (Kao et al., 1998), which influences differentiation, proliferation and apoptosis in many developmental systems.

SMRT has most recently been shown to interact with signal transducers and activators of transcription 5 (STAT5) (Nakajima et al., 2001), which plays a central role in cytokine signaling.

### Multiple mechanisms of regulation

Regulation of proteins with such a potentially broad spectrum of activity is likely to be controlled at many levels, and indeed reports suggest that the actions of N-CoR and SMRT are regulated by several mechanisms. The N-terminus of N-CoR interacts with mSiah2, the mammalian homologue of *Drosophila Seven in absentia* (Zhang et al., 1998a). mSiah2 has been implicated in regulation of proteasomal degradation of proteins (Hu et al., 1997; Li et al., 1997b; Tang et al., 1997), and cotransfection of N-CoR and mSiah2 resulted in a dramatic decrease in N-CoR protein levels, an effect that was not seen in the presence of a proteasome inhibitor (Zhang et al., 1998a).

Although association of N-CoR and SMRT with nuclear receptors is clearly controlled at the level of hormone binding, in several systems, cell signaling events seem capable of directly regulating the association of nuclear receptors with N-CoR and SMRT. Treatment of treated MCF-7 or HeLa cells with forskolin, which stimulates the PKA pathway, or EGF, which stimulates the ERK MAP kinase and PKC pathways, resulted in decreased association of N-CoR with ER in the presence of the antagonist tamoxifen (Lavinsky et al., 1998). In addition, in microinjection assays, treatment with forskolin or EGF converts tamoxifen from an antagonist to an agonist of ER-mediated transcription (Lavinsky et al., 1998). Activation of the ERK MAP kinase pathway by L-throxine (T<sub>4</sub>) results in serine phosphorylation of TR $\beta$ 1 and dissociation of SMRT in a hormone-independent manner (Davis et al., 2000). Similarly, phosphorylation of SMRT by the MAP kinase kinase MEK-1 and MEK-1 kinase (MEKK-1) can inhibit interactions between SMRT and nuclear receptors or PLZF (Hong and Privalsky, 2000). In contrast, phosphorylation of SMRT by casein kinase II (CK2) stabilizes the SMRT–nuclear-receptor interaction (Zhou et al., 2001). Thus, different cell signaling pathways can effect different transcriptional outcomes.

In addition to their role in modulating protein-protein interactions, cell signaling pathways also cause changes in subcellular distribution, presumably to restrict access of transcription factors to co-repressors. CamKIV phosphorylation of the NF $\kappa$ B p65 subunit results not only in an exchange of SMRT for CBP but also in translocation of SMRT to the cytoplasm (Jang et al., 2001). MEK-1 and MEKK-1 signaling produces a redistribution of SMRT from the nucleus to the perinucleus or cytoplasm (Hong and Privalsky, 2000). Interestingly, co-repressors themselves shuttle associated proteins to the nucleus, as is the case for both Su(H)/RBP-J/CBF1 (Zhou and Hayward, 2001) and certain HDAC proteins (Wu et al., 2001). Intracellular signaling events are also thought to influence the subcellular distribution of HDAC proteins (Grozinger and Schreiber, 2000; McKinsey et al., 2000a; McKinsey et al., 2000b) and thus may be a general mechanism by which co-repressor proteins are regulated.

There are also examples of regulation of co-repressor specificity by its association with other co-repressor molecules to form distinct co-repressor complexes. Members of the Ski proto-oncogene family, which includes the proteins Ski and

**Table 1. N-CoR/SMRT in disease**

|                                            | Proposed role for N-CoR/SMRT                                                                                                                                                                             |
|--------------------------------------------|----------------------------------------------------------------------------------------------------------------------------------------------------------------------------------------------------------|
| <b>Leukemias</b>                           |                                                                                                                                                                                                          |
| Acute promyelocytic leukemia (APL)         | APL is caused by gene rearrangements resulting in fusions of RAR- $\alpha$ with PML or PLZF. Both fusion proteins interact with N-CoR and SMRT.                                                          |
| Acute myeloid leukemia (AML)               | AML is caused by gene rearrangements resulting in fusions of AML1 and ETO. The AML1-ETO fusion protein can interact with N-CoR and SMRT.                                                                 |
| Common acute lymphoblastic leukemia (cALL) | cALL is caused by chromosomal rearrangements of <i>TEL</i> , whose product interacts with SMRT.                                                                                                          |
| <b>Other diseases</b>                      |                                                                                                                                                                                                          |
| Resistance to thyroid hormone (RTH)        | A disease caused by mutations in the <i>T<sub>3</sub>R-<math>\beta</math></i> gene that results in a failure to release N-CoR or SMRT upon hormone treatment.                                            |
| Huntington's disease                       | Disease caused by the Huntington's disease gene product, huntingtin, which interacts with N-CoR. N-CoR in the diseased brain is cytoplasmic, whereas in normal brain it is both nuclear and cytoplasmic. |

Sno, form complexes with N-CoR, SMRT, HDACs and mSin3 to regulate transcriptional repression by MAD and TR $\beta$  (Nomura et al., 1999). A co-repressor complex containing N-CoR and Ski or Sno has also been implicated as a negative regulator of the TGF $\beta$  signaling pathway (Luo et al., 1999; Stroschein et al., 1999). Ski or Sno, together with N-CoR, form complexes with the SMAD proteins that positively regulate TGF $\beta$  signaling (Moustakas et al., 2001), repressing TGF $\beta$ -activated transcription (Luo et al., 1999; Stroschein et al., 1999).

SMRT also interacts with the transcriptional repressor SMRT/HDAC1 associated repressor protein (SHARP) (Shi et al., 2001). Interestingly, SHARP binds the steroid receptor RNA coactivator SRA and suppresses SRA-activated steroid receptor transcription activity, providing a mechanism by which SMRT can modulate liganded nuclear receptors (Shi et al., 2001). As the data collected increase, there will doubtlessly prove to be additional mechanisms by which both the regulation and specificity of N-CoR and SMRT activity are controlled.

### Roles in development and disease

Although the biological role of hormonal activation of nuclear receptors is well established, only recently has the biological significance of repression begun to be appreciated, with both N-CoR and SMRT emerging as important players. The role of N-CoR during normal development was revealed by studies of N-CoR-null mice, which die in midgestation and exhibit defects in developmental progression of specific erythrocyte, thymocyte and neural events (Jepsen et al., 2000). Results in erythroblasts were particularly intriguing because the mice had a block in erythroid blast-forming unit (BFU-E) formation that may be related to effects mediated by T<sub>3</sub>R. V-ErbA, an oncogenic form of T<sub>3</sub>R that cannot bind to hormone, owing to mutations in its C-terminal ligand-binding domain (Munoz et al., 1988; Sap et al., 1986), thus functions as a constitutive repressor of transcription (Damm et al., 1989), induces erythroleukemia and fibrosarcomas in chickens and transforms erythroid cells and fibroblasts in culture (Graf and Beug, 1983). The constitutive repression of v-ErbA target genes, which has been linked to recruitment of N-CoR and HDAC activity, (Busch et al., 2000; Ciana et al., 1998) is thought to contribute to avian erythroblastosis virus (AEV)-induced leukemic transformation. N-CoR<sup>-/-</sup> erythroblasts have enhanced levels of one v-ErbA target gene that encodes carbonic anhydrase II; this suggests that unliganded T<sub>3</sub>R requires N-CoR for repression events critical to expansion of erythroblast

progenitors. Studies in primary avian erythroblasts showed that overexpression of T<sub>3</sub>R in the absence of T<sub>3</sub> resulted in sustained proliferation and tightly arrested differentiation of erythroblasts, whereas addition of T<sub>3</sub> caused loss of self-renewal capacity and induced terminal differentiation (Bauer et al., 1998).

A dominant-negative N-CoR protein, lacking the repression domains in the N-terminus but retaining the nuclear receptor interaction domains, has also been used in an attempt to define specific biological roles for co-repressors (Feng et al., 2001). Transgenic mice expressing this construct in hepatocytes showed an increased proliferation of hepatocytes and a derepression of T<sub>3</sub>-regulated hepatic target genes (Feng et al., 2001). A dominant-negative approach has also been used in *Xenopus* and resulted in embryos that exhibited phenotypes similar to those treated by RA, namely reduction of anterior structures such as forebrain and cement gland (Koide et al., 2001). These data suggest that RAR-mediated repression of target genes is critical for head formation.

Whereas knockout and dominant-negative transgenic animals allow one to assess the consequences of loss of co-repressor function, various disease models have allowed investigation of inappropriate gain of co-repressor function (Table 1). For instance, resistance to thyroid hormone (RTH) is a human genetic disease characterized by an impaired physiological response to thyroid hormone and is associated with mutations in T<sub>3</sub>R- $\beta$  (Kopp et al., 1996) that fail to release N-CoR or SMRT upon hormone treatment (Safer et al., 1998; Yoh et al., 1997). Transcriptional activation by mutant T<sub>3</sub>R- $\beta$  in response to hormone is diminished compared with that of wild-type T<sub>3</sub>R- $\beta$ . Repression might also be involved in normal thyroid hormone physiology because deletion of genes encoding all known thyroid hormone receptors results in a phenotype less severe than that of mice lacking thyroid hormone (Gothe et al., 1999). Thus, there seems to be a role for the unliganded T<sub>3</sub>R in development, which suggests co-repressor involvement.

Roles for N-CoR and SMRT in several types of leukemia are also well characterized. Acute promyelocytic leukemia (APL), caused by a block in myeloid differentiation, is associated with rearrangements of RAR- $\alpha$ , which most commonly result in fusions of the RAR- $\alpha$  gene with the promyelocytic leukemia gene (*PML*) or the promyelocytic leukemia zinc finger gene (*PLZF*) (Lin et al., 1999). Both RAR- $\alpha$  fusion proteins retain the ability to interact with N-CoR and SMRT (Hong et al., 1997). Interestingly, although retinoic acid (RA) can induce remission in APLs resulting from PML-RAR- $\alpha$  translocations, APLs

resulting from PLZF-RAR- $\alpha$  translocations are insensitive to RA (Lin et al., 1999). Although co-repressor interactions with PML-RAR- $\alpha$  fusions are less sensitive to the effects of RA than are interactions with wild-type RAR- $\alpha$ , pharmacological concentrations of RA do result in the dismissal of the co-repressor complex and in activation of transcription. In contrast, the PLZF-RAR- $\alpha$  fusion protein interacts with the co-repressor even in the presence of RA. These observations correlate co-repressors with the disease state, because the relative RA sensitivity of the interaction between the RAR- $\alpha$  fusions and N-CoR or SMRT correlates with their response to RA treatment. Interestingly, histone deacetylase inhibitors such as TSA, in combination with RA, not only overcome the transcriptional repressor activity of both PML-RAR- $\alpha$  and PLZF-RAR- $\alpha$  but also render PLZF-RAR- $\alpha$  sensitive to RA (He et al., 1998). Together, these results indicate that the presence of a co-repressor is one criterion for disease progression.

N-CoR and SMRT have also been implicated in acute myeloid leukemias (AML). 12-15% of AMLs result from the t(8;21) translocation between *AML1* and *ETO*. *AML1* upregulates a number of target genes critical to normal hematopoiesis, and the *AML1-ETO* fusion protein represses transcription of these target genes. In common with *ETO*, the *AML1-ETO* fusion protein can interact with N-CoR and SMRT, and mutations that abolish this interaction affect the ability of *AML1-ETO* both to repress transcription and to inhibit differentiation of hematopoietic precursors (Gelmetti et al., 1998; Lutterbach et al., 1998; Wang et al., 1998). The role of N-CoR in AML also appears to be partially due to recruitment of histone deacetylase activity, since recent studies have revealed that the histone deacetylase inhibitors TSA and phenylbutyrate (PB) both partially reverse *ETO*-mediated transcriptional repression, and PB can induce partial differentiation of an *AML1-ETO* cell line (Wang et al., 1999).

A third class of leukemia results from chromosomal rearrangements of the E26 transforming specific (ETS)-related gene *TEL*, which encodes a strong transcriptional repressor that recruits a co-repressor complex including SMRT, mSin3A and HDAC3 (Chakrabarti and Nucifora, 1999; Wang and Hiebert, 2001). The overall theme for involvement of N-CoR and SMRT in progression of these leukemias thus appears to be the ability of histone-deacetylase-associated repression to block differentiation and allow uncontrolled growth of hematopoietic cells, which ultimately results in the diseased state.

N-CoR has also been implicated in pathologies associated with the nervous system. The C-terminus of N-CoR interacts with the N-terminus of the Huntington's disease gene product, huntingtin, in both yeast two-hybrid screens and pull-down assays (Boutell et al., 1999). Although N-CoR is generally thought to exert its action in the nucleus (Horlein et al., 1995), immunohistochemical studies on Huntington's disease brains and control brains revealed that the localization of N-CoR and mSin3 in the diseased cortex and caudate is exclusively cytoplasmic, whereas in the normal brain they are localized in the nucleus as well as the cytoplasm. This suggests that relocalization of co-repressor proteins in the diseased brain alters transcription and is thus involved in the pathology of this disease. Interestingly, though perhaps counter-intuitively, inhibitors of HDAC activity can arrest neurodegeneration associated with Huntington's disease in a *Drosophila* model (Steffan et al., 2001).

## Conclusions

Here, we have focused mainly on the N-CoR/SMRT family of HDAC-associated co-repressors, but there are several repressors that associate with HDACs. These include non-DNA-binding cofactors such as CtBP (Turner and Crossley, 2001) and groucho/TLE proteins (Chen and Courey, 2000), transcription factors that interact directly with HDACs such as MEF2, (Lu et al., 2000), which functions in myogenesis, and proteins involved in methylation-induced gene repression such as MeCP2 (Jones et al., 1998; Nan et al., 1998). In fact, it appears that a single transcription factor can frequently utilize more than one family of co-repressor. Hairy, for example, can interact with both CtBP and groucho/TLE proteins (Paroush et al., 1994; Poortinga et al., 1998), and *Hesx1* interacts with groucho/TLE proteins and N-CoR (Dasen et al., 2001). On the basis of current studies, it is impossible to determine whether more than one co-repressor is bound to a transcription factor at the same time on a given promoter, but these studies will certainly be done in the near future.

It is intriguing, as mentioned earlier, that a growing number of co-repressor complexes are associated, if circumstantially, with proteins connected to redox pathways. These include CTBP, the FAD-binding protein found in the HDAC1/2 and NURD complexes, and the NAD-dependent class 3 HDACs. Several lines of evidence also point to a connection between DNA methylation and histone deacetylation (Dobosy and Selker, 2001), suggesting that multiple enzymatic activities are recruited to DNA, either simultaneously or sequentially, and subsequently modulate transcriptional repression.

We apologize to our colleagues for the many important papers that could not be cited because of space limitations. Work from our laboratory was supported by grants from the NIH (DK07494 to K.J.). M.G.R. is an investigator with the HHMI.

## References

- Aasland, R., Stewart, A. F. and Gibson, T. (1996). The SANT domain: a putative DNA-binding domain in the SWI-SNF and ADA complexes, the transcriptional co-repressor N-CoR and TFIIB. *Trends Biochem. Sci.* **21**, 87-88.
- Andres, M. E., Burger, C., Peral-Rubio, M. J., Battaglioli, E., Anderson, M. E., Grimes, J., Dallman, J., Ballas, N. and Mandel, G. (1999). CoREST: a functional co-repressor required for regulation of neural-specific gene expression. *Proc. Natl. Acad. Sci. USA* **96**, 9873-9878.
- Asahara, H., Dutta, S., Kao, H. Y., Evans, R. M. and Montminy, M. (1999). Pbx-Hox heterodimers recruit coactivator-co-repressor complexes in an isoform-specific manner. *Mol. Cell. Biol.* **19**, 8219-8225.
- Bailey, P., Downes, M., Lau, P., Harris, J., Chen, S. L., Hamamori, Y., Sartorelli, V. and Muscat, G. E. (1999). The nuclear receptor co-repressor N-CoR regulates differentiation: N-CoR directly interacts with MyoD. *Mol. Endocrinol.* **13**, 1155-1168.
- Baniahmad, A., Kohne, A. C. and Renkawitz, R. (1992). A transferable silencing domain is present in the thyroid hormone receptor, in the *v-erbA* oncogene product and in the retinoic acid receptor. *EMBO J.* **11**, 1015-1023.
- Bassi, M. T., Ramesar, R. S., Caciotti, B., Winship, I. M., De Grandi, A., Riboni, M., Townes, P. L., Beighton, P., Ballabio, A. and Borsani, G. (1999). X-linked late-onset sensorineural deafness caused by a deletion involving *OAI* and a novel gene containing WD-40 repeats. *Am. J. Hum. Genet.* **64**, 1604-1616.
- Bauer, A., Mikulits, W., Lagger, G., Stengl, G., Brosch, G. and Beug, H. (1998). The thyroid hormone receptor functions as a ligand-operated developmental switch between proliferation and differentiation of erythroid progenitors. *EMBO J.* **17**, 4291-4303.
- Boutell, J. M., Thomas, P., Neal, J. W., Weston, V. J., Duce, J., Harper, P. S. and Jones, A. L. (1999). Aberrant interactions of transcriptional

- repressor proteins with the Huntington's disease gene product, huntingtin. *Hum. Mol. Genet.* **8**, 1647-1655.
- Bowdish, K. S. and Mitchell, A. P.** (1993). Bipartite structure of an early meiotic upstream activation sequence from *Saccharomyces cerevisiae*. *Mol. Cell. Biol.* **13**, 2172-2181.
- Braunstein, M., Rose, A. B., Holmes, S. G., Allis, C. D. and Broach, J. R.** (1993). Transcriptional silencing in yeast is associated with reduced nucleosome acetylation. *Genes Dev.* **7**, 592-604.
- Busch, K., Martin, B., Baniahmad, A., Martial, J. A., Renkawitz, R. and Muller, M.** (2000). Silencing subdomains of v-ErbA interact cooperatively with co-repressors: involvement of helices 5/6. *Mol. Endocrinol.* **14**, 201-211.
- Chakrabarti, S. R. and Nucifora, G.** (1999). The leukemia-associated gene TEL encodes a transcription repressor which associates with SMRT and mSin3A. *Biochem. Biophys. Res. Commun.* **264**, 871-877.
- Chen, G. and Courey, A. J.** (2000). Groucho/TLE family proteins and transcriptional repression. *Gene* **249**, 1-16.
- Chen, J. D. and Evans, R. M.** (1995). A transcriptional co-repressor that interacts with nuclear hormone receptors. *Nature* **377**, 454-457.
- Ciana, P., Braliou, G. G., Demay, F. G., von Lindern, M., Barettoni, D., Beug, H. and Stunnenberg, H. G.** (1999). Leukemic transformation by the v-ErbA oncoprotein entails constitutive binding to and repression of an erythroid enhancer in vivo. *EMBO J.* **17**, 7382-7394.
- Cohen, R. N., Putney, A., Wondisford, F. E. and Hollenberg, A. N.** (2000). The nuclear co-repressors recognize distinct nuclear receptor complexes. *Mol. Endocrinol.* **14**, 900-914.
- Cohen, R. N., Brzostek, S., Kim, B., Chorev, M., Wondisford, F. E. and Hollenberg, A. N.** (2001). The specificity of interactions between nuclear hormone receptors and co-repressors is mediated by distinct amino acid sequences within the interacting domains. *Mol. Endocrinol.* **15**, 1049-1061.
- Crawford, P. A., Dorn, C., Sadovsky, Y. and Milbrandt, J.** (1998). Nuclear receptor DAX-1 recruits nuclear receptor co-repressor N-CoR to steroidogenic factor 1. *Mol. Cell. Biol.* **18**, 2949-2956.
- Damm, K., Thompson, C. C. and Evans, R. M.** (1989). Protein encoded by v-erbA functions as a thyroid-hormone receptor antagonist. *Nature* **339**, 593-597.
- Dasen, J. S., Barbera, J. P., Herman, T. S., Connell, S. O., Olson, L., Ju, B., Tollkuhn, J., Baek, S. H., Rose, D. W. and Rosenfeld, M. G.** (2001). Temporal regulation of a paired-like homeodomain repressor/TLE corepressor complex and a related activator is required for pituitary organogenesis. *Genes Dev.* **15**, 3193-3207.
- Davis, P. J., Shih, A., Lin, H. Y., Martino, L. J. and Davis, F. B.** (2000). Thyroxine promotes association of mitogen-activated protein kinase and nuclear thyroid hormone receptor (TR) and causes serine phosphorylation of TR. *J. Biol. Chem.* **275**, 38032-38039.
- Deckert, J. and Struhl, K.** (2001). Histone acetylation at promoters is differentially affected by specific activators and repressors. *Mol. Cell Biol.* **21**, 2726-2735.
- Dhordain, P., Lin, R. J., Quief, S., Lantoine, D., Kerckaert, J. P., Evans, R. M. and Albagli, O.** (1998). The LAZ3(BCL-6) oncoprotein recruits a SMRT/mSin3A/histone deacetylase containing complex to mediate transcriptional repression. *Nucleic Acids Res.* **26**, 4645-4651.
- Dobosy, J. R. and Selker, E. U.** (2001). Emerging connections between DNA methylation and histone acetylation. *Cell. Mol. Life Sci.* **58**, 721-727.
- Dong, X., Tsuda, L., Zavitz, K. H., Lin, M., Li, S., Carthew, R. W. and Zipursky, S. L.** (1999). ebi regulates epidermal growth factor receptor signaling pathways in *Drosophila*. *Genes Dev.* **13**, 954-965.
- Dowell, P., Ishmael, J. E., Avram, D., Peterson, V. J., Nevriy, D. J. and Leid, M.** (1999). Identification of nuclear receptor co-repressor as a peroxisome proliferator-activated receptor alpha interacting protein. *J. Biol. Chem.* **274**, 15901-15907.
- Feng, X., Jiang, Y., Meltzer, P. and Yen, P. M.** (2001). Transgenic targeting of a dominant negative co-repressor to liver blocks basal repression by thyroid hormone receptor and increases cell proliferation. *J. Biol. Chem.* **276**, 15066-15072.
- Gelmetti, V., Zhang, J., Fanelli, M., Minucci, S., Pelicci, P. G. and Lazar, M. A.** (1998). Aberrant recruitment of the nuclear receptor co-repressor-histone deacetylase complex by the acute myeloid leukemia fusion partner ETO. *Mol. Cell. Biol.* **18**, 7185-7191.
- Gothe, S., Wang, Z., Ng, L., Kindblom, J. M., Barros, A. C., Ohlsson, C., Vennstrom, B. and Forrest, D.** (1999). Mice devoid of all known thyroid hormone receptors are viable but exhibit disorders of the pituitary-thyroid axis, growth, and bone maturation. *Genes Dev.* **13**, 1329-1341.
- Gottschling, D. E.** (2000). Gene silencing: two faces of SIR2. *Curr. Biol.* **10**, R708-R711.
- Graf, T. and Beug, H.** (1983). Role of the v-erbA and v-erbB oncogenes of avian erythroblastosis virus in erythroid cell transformation. *Cell* **34**, 7-9.
- Gray, S. G. and Ekstrom, T. J.** (2001). The human histone deacetylase family. *Exp. Cell Res.* **262**, 75-83.
- Grozinger, C. M. and Schreiber, S. L.** (2000). Regulation of histone deacetylase 4 and 5 and transcriptional activity by 14-3-3-dependent cellular localization. *Proc. Natl. Acad. Sci. USA* **97**, 7835-7840.
- Grunstein, M.** (1990). Histone function in transcription. *Annu. Rev. Cell Biol.* **6**, 643-678.
- Guenther, M. G., Lane, W. S., Fischle, W., Verdin, E., Lazar, M. A. and Shiekhattar, R.** (2000). A core SMRT co-repressor complex containing HDAC3 and TBL1, a WD40-repeat protein linked to deafness. *Genes Dev.* **14**, 1048-1057.
- Guenther, M. G., Barak, O. and Lazar, M. A.** (2001). The smrt and n-co-repressors are activating cofactors for histone deacetylase 3. *Mol. Cell Biol.* **21**, 6091-6101.
- He, L. Z., Guidez, F., Tribioli, C., Peruzzi, D., Ruthardt, M., Zelent, A. and Pandolfi, P. P.** (1998). Distinct interactions of PML-RARalpha and PLZF-RARalpha with co-repressors determine differential responses to RA in APL. *Nat. Genet.* **18**, 126-135.
- Heery, D. M., Kalkhoven, E., Hoare, S. and Parker, M. G.** (1997). A signature motif in transcriptional co-activators mediates binding to nuclear receptors. *Nature* **387**, 733-736.
- Heinzel, T., Lavinsky, R. M., Mullen, T. M., Soderstrom, M., Laherty, C. D., Torchia, J., Yang, W. M., Brard, G., Ngo, S. D., Davie, J. R. et al.** (1997). A complex containing N-CoR, mSin3 and histone deacetylase mediates transcriptional repression. *Nature* **387**, 43-48.
- Hong, S. H., David, G., Wong, C. W., Dejean, A. and Privalsky, M. L.** (1997). SMRT co-repressor interacts with PLZF and with the PML-retinoic acid receptor alpha (RARalpha) and PLZF-RARalpha oncoproteins associated with acute promyelocytic leukemia. *Proc. Natl. Acad. Sci. USA* **94**, 9028-9033.
- Hong, S. H. and Privalsky, M. L.** (2000). The SMRT co-repressor is regulated by a MEK-1 kinase pathway: inhibition of co-repressor function is associated with SMRT phosphorylation and nuclear export. *Mol. Cell Biol.* **20**, 6612-6625.
- Horlein, A. J., Naar, A. M., Heinzel, T., Torchia, J., Gloss, B., Kurokawa, R., Ryan, A., Kamei, Y., Soderstrom, M., Glass, C. K. et al.** (1995). Ligand-independent repression by the thyroid hormone receptor mediated by a nuclear receptor co-repressor. *Nature* **377**, 397-404.
- Hu, G., Chung, Y. L., Glover, T., Valentine, V., Look, A. T. and Fearon, E. R.** (1997). Characterization of human homologs of the *Drosophila* seven in absentia (sina) gene. *Genomics* **46**, 103-111.
- Hu, X. and Lazar, M. A.** (1999). The CoRNR motif controls the recruitment of co-repressors by nuclear hormone receptors. *Nature* **402**, 93-96.
- Hu, X., Li, Y. and Lazar, M. A.** (2001). Determinants of CoRNR-dependent repression complex assembly on nuclear hormone receptors. *Mol. Cell Biol.* **21**, 1747-1758.
- Huang, E. Y., Zhang, J., Miska, E. A., Guenther, M. G., Kouzarides, T. and Lazar, M. A.** (2000). Nuclear receptor co-repressors partner with class II histone deacetylases in a Sin3-independent repression pathway. *Genes Dev.* **14**, 45-54.
- Huang, X. and Kadonaga, J. T.** (2001). Biochemical analysis of transcriptional repression by *Drosophila* histone deacetylase 1. *J. Biol. Chem.* **276**, 12497-12500.
- Humphrey, G. W., Wang, Y., Russanova, V. R., Hirai, T., Qin, J., Nakatani, Y. and Howard, B. H.** (2001). Stable histone deacetylase complexes distinguished by the presence of SANT domain proteins CoREST/kiaa0071 and Mta-L1. *J. Biol. Chem.* **276**, 6817-6824.
- Huynh, K. D. and Bardwell, V. J.** (1998). The BCL-6 POZ domain and other POZ domains interact with the co-repressors N-CoR and SMRT. *Oncogene* **17**, 2473-2484.
- Imai, S., Armstrong, C. M., Kaerberlein, M. and Guarente, L.** (2000). Transcriptional silencing and longevity protein Sir2 is an NAD-dependent histone deacetylase. *Nature* **403**, 795-800.
- Iso, T., Sartorelli, V., Poizat, C., Iezzi, S., Wu, H. Y., Chung, G., Kedes, L. and Hamamori, Y.** (2001). Herp, a novel heterodimer partner of hes/e(spl) in notch signaling. *Mol. Cell Biol.* **21**, 6080-6089.
- Jackson, T. A., Richer, J. K., Bain, D. L., Takimoto, G. S., Tung, L. and Horwitz, K. B.** (1997). The partial agonist activity of antagonist-occupied steroid receptors is controlled by a novel hinge domain-binding coactivator L7/SPA and the co-repressors N-CoR or SMRT. *Mol. Endocrinol.* **11**, 693-705.
- Jang, M. K., Goo, Y. H., Sohn, Y. C., Kim, Y. S., Lee, S. K., Kang, H.,**



- Cheong, J. and Lee, J. W. (2001). Ca<sup>2+</sup>/calmodulin-dependent protein kinase IV stimulates nuclear factor- $\kappa$ B transactivation via phosphorylation of the p65 subunit. *J. Biol. Chem.* **276**, 20005-20010.
- Jepsen, K., Hermanson, O., Onami, T. M., Gleiberman, A. S., Lunyak, V., McEvilly, R. J., Kurokawa, R., Kumar, V., Liu, F., Seto, E. et al. (2000). Combinatorial roles of the nuclear receptor co-repressor in transcription and development. *Cell* **102**, 753-763.
- Jones, P. L., Veenstra, G. J., Wade, P. A., Vermaak, D., Kass, S. U., Landsberger, N., Strouboulis, J. and Wolffe, A. P. (1998). Methylated DNA and MeCP2 recruit histone deacetylase to repress transcription. *Nat. Genet.* **19**, 187-191.
- Jones, P. L., Sachs, L. M., Rouse, N., Wade, P. A. and Shi, Y. B. (2001). Multiple N-CoR complexes contain distinct histone deacetylases. *J. Biol. Chem.* **276**, 8807-8811.
- Kakizawa, T., Miyamoto, T., Ichikawa, K., Takeda, T., Suzuki, S., Mori, J., Kumagai, M., Yamashita, K. and Hashizume, K. (2001). Silencing mediator for retinoid and thyroid hormone receptors interacts with octamer transcription factor-1 and acts as a transcriptional repressor. *J. Biol. Chem.* **276**, 9720-9725.
- Kao, H. Y., Ordentlich, P., Koyano-Nakagawa, N., Tang, Z., Downes, M., Kintner, C. R., Evans, R. M. and Kadesch, T. (1998). A histone deacetylase co-repressor complex regulates the Notch signal transduction pathway. *Genes Dev.* **12**, 2269-2277.
- Kao, H. Y., Downes, M., Ordentlich, P. and Evans, R. M. (2000). Isolation of a novel histone deacetylase reveals that class I and class II deacetylases promote SMRT-mediated repression. *Genes Dev.* **14**, 55-66.
- Knoepfler, P. S. and Eisenman, R. N. (1999). Sin meets NuRD and other tails of repression. *Cell* **99**, 447-450.
- Koide, T., Downes, M., Chandraratna, R. A., Blumberg, B. and Umesono, K. (2001). Active repression of RAR signaling is required for head formation. *Genes Dev.* **15**, 2111-2121.
- Kokura, K., Kaul, S. C., Wadhwa, R., Nomura, T., Khan, M. M., Shinagawa, T., Yasukawa, T., Colmenares, C. and Ishii, S. (2001). The Ski Protein Family Is Required for MeCP2-mediated Transcriptional Repression. *J. Biol. Chem.* **276**, 34115-34121.
- Kopp, P., Kitajima, K. and Jameson, J. L. (1996). Syndrome of resistance to thyroid hormone: insights into thyroid hormone action. *Proc. Soc. Exp. Biol. Med.* **211**, 49-61.
- Landry, J., Sutton, A., Tafrov, S. T., Heller, R. C., Stebbins, J., Pillus, L. and Sternglanz, R. (2000). The silencing protein SIR2 and its homologs are NAD-dependent protein deacetylases. *Proc. Natl. Acad. Sci. USA* **97**, 5807-5811.
- Lavinsky, R. M., Jepsen, K., Heinzel, T., Torchia, J., Mullen, T. M., Schiff, R., Del-Rio, A. L., Ricote, M., Ngo, S., Gemsch, J. et al. (1998). Diverse signaling pathways modulate nuclear receptor recruitment of N-CoR and SMRT complexes. *Proc. Natl. Acad. Sci. USA* **95**, 2920-2925.
- Lee, S. K., Kim, J. H., Lee, Y. C., Cheong, J. and Lee, J. W. (2000). Silencing mediator of retinoic acid and thyroid hormone receptors, as a novel transcriptional co-repressor molecule of activating protein-1, nuclear factor- $\kappa$ B, and serum response factor. *J. Biol. Chem.* **275**, 12470-12474.
- Li, H., Leo, C., Schroen, D. J. and Chen, J. D. (1997a). Characterization of receptor interaction and transcriptional repression by the co-repressor SMRT. *Mol. Endocrinol.* **11**, 2025-2037.
- Li, S., Li, Y., Carthew, R. W. and Lai, Z. C. (1997b). Photoreceptor cell differentiation requires regulated proteolysis of the transcriptional repressor Tramtrack. *Cell* **90**, 469-478.
- Li, J., Wang, J., Nawaz, Z., Liu, J. M., Qin, J. and Wong, J. (2000). Both co-repressor proteins SMRT and N-CoR exist in large protein complexes containing HDAC3. *EMBO J.* **19**, 4342-4350.
- Lin, R. J., Egan, D. A. and Evans, R. M. (1999). Molecular genetics of acute promyelocytic leukemia. *Trends Genet.* **15**, 179-184.
- Lu, J., McKinsey, T. A., Nicol, R. L. and Olson, E. N. (2000). Signal-dependent activation of the MEF2 transcription factor by dissociation from histone deacetylases. *Proc. Natl. Acad. Sci. USA* **97**, 4070-4075.
- Luo, K., Stroschein, S. L., Wang, W., Chen, D., Martens, E., Zhou, S. and Zhou, Q. (1999). The Ski oncoprotein interacts with the Smad proteins to repress TGF $\beta$  signaling. *Genes Dev.* **13**, 2196-2206.
- Luo, J., Nikolaev, A. Y., Imai, S. I., Chen, D., Su, F., Shiloh, A., Guarente, L. and Gu, W. (2001). Negative control of p53 by Sir2 promotes cell survival under stress. *Cell* **107**, 137-148.
- Lutterbach, B., Westendorf, J. J., Linggi, B., Patten, A., Moniwa, M., Davie, J. R., Huynh, K. D., Bardwell, V. J., Lavinsky, R. M., Rosenfeld, M. G. et al. (1998). ETO, a target of t(8;21) in acute leukemia, interacts with the N-CoR and mSin3 co-repressors. *Mol. Cell. Biol.* **18**, 7176-7184.
- McInerney, E. M., Rose, D. W., Flynn, S. E., Westin, S., Mullen, T. M., Krones, A., Inostroza, J., Torchia, J., Nolte, R. T., Assa-Munt, N. et al. (1998). Determinants of coactivator LXXLL motif specificity in nuclear receptor transcriptional activation. *Genes Dev.* **12**, 3357-3368.
- McKenzie, E. A., Kent, N. A., Dowell, S. J., Moreno, F., Bird, L. E. and Mellor, J. (1993). The centromere and promoter factor, 1, CPF1, of *Saccharomyces cerevisiae* modulates gene activity through a family of factors including SPT21, RPD1 (SIN3), hdac and CCR4. *Mol. Gen. Genet.* **240**, 374-386.
- McKinsey, T. A., Zhang, C. L., Lu, J. and Olson, E. N. (2000a). Signal-dependent nuclear export of a histone deacetylase regulates muscle differentiation. *Nature* **408**, 106-111.
- McKinsey, T. A., Zhang, C. L. and Olson, E. N. (2000b). Activation of the myocyte enhancer factor-2 transcription factor by calcium/calmodulin-dependent protein kinase-stimulated binding of 14-3-3 to histone deacetylase 5. *Proc. Natl. Acad. Sci. USA* **97**, 14400-14405.
- Moustakas, A., Souchelnytskyi, S. and Heldin, C. H. (2001). Smad regulation in TGF- $\beta$  signal transduction. *J. Cell Sci.* **114**, 4359-4369.
- Munoz, A., Zenke, M., Gehring, U., Sap, J., Beug, H. and Vennstrom, B. (1988). Characterization of the hormone-binding domain of the chicken *c-erbA*/thyroid hormone receptor protein. *EMBO J.* **7**, 155-159.
- Nagy, L., Kao, H. Y., Chakravarti, D., Lin, R. J., Hassig, C. A., Ayer, D. E., Schreiber, S. L. and Evans, R. M. (1997). Nuclear receptor repression mediated by a complex containing SMRT, mSin3A, and histone deacetylase. *Cell* **89**, 373-380.
- Nagy, L., Kao, H. Y., Love, J. D., Li, C., Banayo, E., Gooch, J. T., Krishna, V., Chatterjee, K., Evans, R. M. and Schwabe, J. W. (1999). Mechanism of co-repressor binding and release from nuclear hormone receptors. *Genes Dev.* **13**, 3209-3216.
- Nakajima, H., Brindle, P. K., Handa, M. and Ihle, J. N. (2001). Functional interaction of STAT5 and nuclear receptor co-repressor SMRT: implications in negative regulation of STAT5-dependent transcription. *EMBO J.* **20**, 6836-6844.
- Nan, X., Ng, H. H., Johnson, C. A., Laherty, C. D., Turner, B. M., Eisenman, R. N. and Bird, A. (1998). Transcriptional repression by the methyl-CpG-binding protein MeCP2 involves a histone deacetylase complex. *Nature* **393**, 386-389.
- Nasmyth, K. A. (1982). The regulation of yeast mating-type chromatin structure by SIR: an action at a distance affecting both transcription and transposition. *Cell* **30**, 567-578.
- Nasmyth, K., Stillman, D. and Kipling, D. (1987). Both positive and negative regulators of HO transcription are required for mother-cell-specific mating-type switching in yeast. *Cell* **48**, 579-587.
- Nibu, Y., Zhang, H. and Levine, M. (1998). Interaction of short-range repressors with *Drosophila* CtBP in the embryo. *Science* **280**, 101-104.
- Nomura, T., Khan, M. M., Kaul, S. C., Dong, H. D., Wadhwa, R., Colmenares, C., Kohno, I. and Ishii, S. (1999). Ski is a component of the histone deacetylase complex required for transcriptional repression by Mad and thyroid hormone receptor. *Genes Dev.* **13**, 412-423.
- Ordentlich, P., Downes, M., Xie, W., Genin, A., Spinner, N. B. and Evans, R. M. (1999). Unique forms of human and mouse nuclear receptor co-repressor SMRT. *Proc. Natl. Acad. Sci. USA* **96**, 2639-2644.
- Park, E. J., Schroen, D. J., Yang, M., Li, H., Li, L. and Chen, J. D. (1999). SMRTe, a silencing mediator for retinoid and thyroid hormone receptors-extended isoform that is more related to the nuclear receptor co-repressor. *Proc. Natl. Acad. Sci. USA* **96**, 3519-3524.
- Paroush, Z., Finley, R. L., Jr, Kidd, T., Wainwright, S. M., Ingham, P. W., Brent, R. and Ish-Horowicz, D. (1994). Groucho is required for *Drosophila* neurogenesis, segmentation, and sex determination and interacts directly with hairy-related bHLH proteins. *Cell* **79**, 805-815.
- Perissi, V., Staszewski, L. M., McInerney, E. M., Kurokawa, R., Krones, A., Rose, D. W., Lambert, M. H., Milburn, M. V., Glass, C. K. and Rosenfeld, M. G. (1999). Molecular determinants of nuclear receptor-co-repressor interaction. *Genes Dev.* **13**, 3198-3208.
- Poorthinga, G., Watanabe, M. and Parkhurst, S. M. (1998). *Drosophila* CtBP: a Hairy-interacting protein required for embryonic segmentation and hairy-mediated transcriptional repression. *EMBO J.* **17**, 2067-2078.
- Rine, J., Strathern, J. N., Hicks, J. B. and Herskowitz, I. (1979). A suppressor of mating-type locus mutations in *Saccharomyces cerevisiae*: evidence for and identification of cryptic mating-type loci. *Genetics* **93**, 877-901.
- Rundlett, S. E., Carmen, A. A., Kobayashi, R., Bavykin, S., Turner, B. M. and Grunstein, M. (1996). HDAC1 and RPD3 are members of distinct yeast

- histone deacetylase complexes that regulate silencing and transcription. *Proc. Natl. Acad. Sci. USA* **93**, 14503-14508.
- Safer, J. D., Cohen, R. N., Hollenberg, A. N. and Wondisford, F. E.** (1998). Defective release of co-repressor by hinge mutants of the thyroid hormone receptor found in patients with resistance to thyroid hormone. *J. Biol. Chem.* **273**, 30175-30182.
- Sap, J., Munoz, A., Damm, K., Goldberg, Y., Ghysdael, J., Leutz, A., Beug, H. and Vennstrom, B.** (1986). The c-erb-A protein is a high-affinity receptor for thyroid hormone. *Nature* **324**, 635-640.
- Schaeper, U., Subramanian, T., Lim, L., Boyd, J. M. and Chinnadurai, G.** (1998). Interaction between a cellular protein that binds to the C-terminal region of adenovirus E1A (CtBP) and a novel cellular protein is disrupted by E1A through a conserved PLDLS motif. *J. Biol. Chem.* **273**, 8549-8552.
- Seol, W., Mahon, M. J., Lee, Y. K. and Moore, D. D.** (1996). Two receptor interacting domains in the nuclear hormone receptor co-repressor RIP13/N-CoR. *Mol. Endocrinol.* **10**, 1646-1655.
- Shang, Y., Hu, X., DiRenzo, J., Lazar, M. A. and Brown, M.** (2000). Cofactor dynamics and sufficiency in estrogen receptor-regulated transcription. *Cell* **103**, 843-852.
- Shanmugam, K., Green, N. C., Rambaldi, I., Saragovi, H. U. and Featherstone, M. S.** (1999). PBX and MEIS as non-DNA-binding partners in trimeric complexes with HOX proteins. *Mol. Cell. Biol.* **19**, 7577-7588.
- Shi, Y., Downes, M., Xie, W., Kao, H. Y., Ordentlich, P., Tsai, C. C., Hon, M. and Evans, R. M.** (2001). Sharp, an inducible cofactor that integrates nuclear receptor repression and activation. *Genes Dev.* **15**, 1140-1151.
- Shibata, H., Nawaz, Z., Tsai, S. Y., O'Malley, B. W. and Tsai, M. J.** (1997). Gene silencing by chicken ovalbumin upstream promoter-transcription factor I (COUP-TFI) is mediated by transcriptional co-repressors, nuclear receptor-co-repressor (N-CoR) and silencing mediator for retinoic acid receptor and thyroid hormone receptor (SMRT). *Mol. Endocrinol.* **11**, 714-724.
- Smith, C. L., Nawaz, Z. and O'Malley, B. W.** (1997). Coactivator and co-repressor regulation of the agonist/antagonist activity of the mixed antiestrogen, 4-hydroxytamoxifen. *Mol. Endocrinol.* **11**, 657-666.
- Smith, J. S., Brachmann, C. B., Celic, I., Kenna, M. A., Muhammad, S., Starai, V. J., Avalos, J. L., Escalante-Semerena, J. C., Grubmeyer, C., Wolberger, C. et al.** (2000). A phylogenetically conserved NAD<sup>+</sup>-dependent protein deacetylase activity in the Sir2 protein family. *Proc. Natl. Acad. Sci. USA* **97**, 6658-6663.
- Steffan, J. S., Bodai, L., Pallos, J., Poelman, M., McCampbell, A., Apostol, B. L., Kazantsev, A., Schmidt, E., Zhu, Y. Z., Greenwald, M. et al.** (2001). Histone deacetylase inhibitors arrest polyglutamine-dependent neurodegeneration in *Drosophila*. *Nature* **413**, 739-743.
- Stroschein, S. L., Wang, W., Zhou, S., Zhou, Q. and Luo, K.** (1999). Negative feedback regulation of TGF-beta signaling by the SnoN oncoprotein. *Science* **286**, 771-774.
- Tang, A. H., Neufeld, T. P., Kwan, E. and Rubin, G. M.** (1997). PHYL acts to down-regulate TTK88, a transcriptional repressor of neuronal cell fates, by a SINA-dependent mechanism. *Cell* **90**, 459-467.
- Tong, J. K., Hassig, C. A., Schnitzler, G. R., Kingston, R. E. and Schreiber, S. L.** (1998). Chromatin deacetylation by an ATP-dependent nucleosome remodelling complex. *Nature* **395**, 917-921.
- Tsang, A. W. and Escalante-Semerena, J. C.** (1998). CobB, a new member of the SIR2 family of eucaryotic regulatory proteins, is required to compensate for the lack of nicotinate mononucleotide:5,6-dimethylbenzimidazole phosphoribosyltransferase activity in cobT mutants during cobalamin biosynthesis in *Salmonella typhimurium* LT2. *J. Biol. Chem.* **273**, 31788-31794.
- Turner, B. M.** (1993). Decoding the nucleosome. *Cell* **75**, 5-8.
- Turner, J. and Crossley, M.** (2001). The CtBP family: enigmatic and enzymatic transcriptional co-repressors. *BioEssays* **23**, 683-690.
- Underhill, C., Qutob, M. S., Yee, S. P. and Torchia, J.** (2000). A novel nuclear receptor co-repressor complex, N-CoR, contains components of the mammalian SWI/SNF complex and the co-repressor KAP-1. *J. Biol. Chem.* **275**, 40463-40470.
- Van Lint, C., Emiliani, S. and Verdin, E.** (1996). The expression of a small fraction of cellular genes is changed in response to histone hyperacetylation. *Gene Expr.* **5**, 245-253.
- Vannier, D., Balderes, D. and Shore, D.** (1996). Evidence that the transcriptional regulators SIN3 and RPD3, and a novel gene (SDS3) with similar functions, are involved in transcriptional silencing in *S. cerevisiae*. *Genetics* **144**, 1343-1353.
- Vaziri, H., Dessain, S. K., Eaton, E. N., Imai, S. I., Frye, R. A., Pandita, T. K., Guarente, L. and Weinberg, R. A.** (2001). hSIR2<sup>SIRT1</sup> Functions as an NAD-Dependent p53 Deacetylase. *Cell* **107**, 149-160.
- Vidal, M. and Gaber, R. F.** (1991). RPD3 encodes a second factor required to achieve maximum positive and negative transcriptional states in *Saccharomyces cerevisiae*. *Mol. Cell. Biol.* **11**, 6317-6327.
- Vidal, M., Strich, R., Esposito, R. E. and Gaber, R. F.** (1991). RPD1 (SIN3/UME4) is required for maximal activation and repression of diverse yeast genes. *Mol. Cell. Biol.* **11**, 6306-6316.
- Wang, L. and Hiebert, S. W.** (2001). TEL contacts multiple co-repressors and specifically associates with histone deacetylase-3. *Oncogene* **20**, 3716-3725.
- Wang, J., Hoshino, T., Redner, R. L., Kajigaya, S. and Liu, J. M.** (1998). ETO, fusion partner in t(8;21) acute myeloid leukemia, represses transcription by interaction with the human N-CoR/mSin3/HDAC1 complex. *Proc. Natl. Acad. Sci. USA* **95**, 10860-10865.
- Wang, J., Sauntharajah, Y., Redner, R. L. and Liu, J. M.** (1999). Inhibitors of histone deacetylase relieve ETO-mediated repression and induce differentiation of AML1-ETO leukemia cells. *Cancer Res.* **59**, 2766-2769.
- Wen, Y. D., Perissi, V., Staszewski, L. M., Yang, W. M., Kronen, A., Glass, C. K., Rosenfeld, M. G. and Seto, E.** (2000). The histone deacetylase-3 complex contains nuclear receptor co-repressors. *Proc. Natl. Acad. Sci. USA* **97**, 7202-7207.
- Winston, F. and Carlson, M.** (1992). Yeast SNF/SWI transcriptional activators and the SPT/SIN chromatin connection. *Trends Genet.* **8**, 387-391.
- Wong, C. W. and Privalsky, M. L.** (1998). Components of the SMRT co-repressor complex exhibit distinctive interactions with the POZ domain oncoproteins PLZF, PLZF-RARalpha, and BCL-6. *J. Biol. Chem.* **273**, 27695-27702.
- Wu, X., Li, H., Park, E. J. and Chen, J. D.** (2001). SMRT inhibits MEF2C transcriptional activation by targeting HDAC4 and 5 to nuclear domains. *J. Biol. Chem.* **276**, 24177-24185.
- Xu, J., Nawaz, Z., Tsai, S. Y., Tsai, M. J. and O'Malley, B. W.** (1996). The extreme C terminus of progesterone receptor contains a transcriptional repressor domain that functions through a putative co-repressor. *Proc. Natl. Acad. Sci. USA* **93**, 12195-12199.
- Xu, L., Lavinsky, R. M., Dasen, J. S., Flynn, S. E., McInerney, E. M., Mullen, T. M., Heinzel, T., Szeto, D., Korzus, E., Kurokawa, R. et al.** (1998). Signal-specific co-activator domain requirements for Pit-1 activation. *Nature* **395**, 301-306.
- Xue, Y., Wong, J., Moreno, G. T., Young, M. K., Cote, J. and Wang, W.** (1998). NURD, a novel complex with both ATP-dependent chromatin-remodeling and histone deacetylase activities. *Mol. Cell* **2**, 851-861.
- Yoh, S. M., Chatterjee, V. K. and Privalsky, M. L.** (1997). Thyroid hormone resistance syndrome manifests as an aberrant interaction between mutant T3 receptors and transcriptional co-repressors. *Mol. Endocrinol.* **11**, 470-480.
- You, A., Tong, J. K., Grozinger, C. M. and Schreiber, S. L.** (2001). CoREST is an integral component of the CoREST-human histone deacetylase complex. *Proc Natl Acad Sci USA* **98**, 1454-1458.
- Zamir, L., Harding, H. P., Atkins, G. B., Horlein, A., Glass, C. K., Rosenfeld, M. G. and Lazar, M. A.** (1996). A nuclear hormone receptor co-repressor mediates transcriptional silencing by receptors with distinct repression domains. *Mol. Cell. Biol.* **16**, 5458-5465.
- Zhang, Y., Iratni, R., Erdjument-Bromage, H., Tempst, P. and Reinberg, D.** (1997). Histone deacetylases and SAP18, a novel polypeptide, are components of a human Sin3 complex. *Cell* **89**, 357-364.
- Zhang, J., Guenther, M. G., Carthew, R. W. and Lazar, M. A.** (1998a). Proteasomal regulation of nuclear receptor co-repressor-mediated repression. *Genes Dev.* **12**, 1775-1780.
- Zhang, Y., LeRoy, G., Seelig, H. P., Lane, W. S. and Reinberg, D.** (1998b). The dermatomyositis-specific autoantigen Mi2 is a component of a complex containing histone deacetylase and nucleosome remodeling activities. *Cell* **95**, 279-289.
- Zhang, Y., Sun, Z. W., Iratni, R., Erdjument-Bromage, H., Tempst, P., Hampsey, M. and Reinberg, D.** (1998c). SAP30, a novel protein conserved between human and yeast, is a component of a histone deacetylase complex. *Mol. Cell* **1**, 1021-1031.
- Zhang, Y., Ng, H. H., Erdjument-Bromage, H., Tempst, P., Bird, A. and Reinberg, D.** (1999). Analysis of the NuRD subunits reveals a histone deacetylase core complex and a connection with DNA methylation. *Genes Dev.* **13**, 1924-1935.
- Zhou, S. and Hayward, S. D.** (2001). Nuclear localization of cbf1 is regulated by interactions with the smrt co-repressor complex. *Mol. Cell. Biol.* **21**, 6222-6232.
- Zhou, Y., Gross, W., Hong, S. H. and Privalsky, M. L.** (2001). The SMRT co-repressor is a target of phosphorylation by protein kinase CK2 (casein kinase II). *Mol. Cell. Biochem.* **220**, 1-13.
